# Supplementary material for: Enzymatic assembly of adhesive molecular networks with sequence-dependent mechanical properties inspired by mussel foot proteins
Source: Royal Society of Chemistry journal article supplement (doi:10.1039/c8py01581c), 2019-01-01
Supplement: c8py01581c1.pdf [file c8py01581c1.pdf]

## Supporting Information for

### **Enzymatic Assembly of Adhesive Molecular Networks with Sequence-Dependent Mechanical Properties Inspired by Mussel Foot Proteins**

Byung Min Park, Jiren Luo and Fei Sun\*<sup>1,2</sup>

<sup>1</sup>Department of Chemical and Biological Engineering

<sup>2</sup>Center of Systems Biology and Human Health and Institute for Advanced Study

The Hong Kong University of Science and Technology, Clear Water Bay, Kowloon, Hong Kong.

\*Email: kefsun@ust.hk

## Materials and Methods

**Gene Construction.** *Escherichia coli* strain DH5 $\alpha$  was used for molecular cloning. The synthetic DNA fragments (Sangon Co.) encoding GRKYYGRGD (TM3-GRGD), GYKYYGRGD (TM5-1-GRGD) and KKYKYYGRGD (TM5-2-GRGD) were inserted into the N-, C-termini and the middle of ELP within the pQE80I-ELP plasmid using restriction site pairs: Nhe1/Sal1, Sac1/Spe1, Xho1/Kpn1 for N-terminus, center, and C-terminus respectively. The GRGD cell-binding ligand was introduced to enhance cell adhesion.

**DNA sequences of TM fragments with RGD sites.**  
**TM3:** GGACGAAAGTATTATGGTCGTGGTGAT, **TM5-1:** GGTTACAAGAAGTATTATGGTCGTGGTGAT,  
**TM5-2:** AAGAAATACTATTATAAATATGGTCGTGGTGAT.

**Protein Expression and Purification.** *E. coli* BL21 (DE3) cells transformed with the desired construct were grown in LB at 37°C until an OD<sub>600</sub> of ~0.8. Then the protein expression was induced by addition of isopropyl  $\beta$ -D-1-thiogalactopyranoside (IPTG, 500  $\mu$ M). After 4 h at 37°C, cells were harvested. The cells were then lysed through sonication on ice at 150 W power, 0.5-sec interval with a  $\frac{3}{4}$  inch disruptor horn for 3 min. The supernatant was obtained through centrifugation at 12000 g and collected for protein purification. The proteins were purified by HisTrap HP columns (GE Healthcare, Inc.) following the manufacturer's instructions. Protein purity was assessed by SDS-PAGE. The resulting proteins were dialyzed against MilliQ water at 4°C, flash frozen with liquid N<sub>2</sub> and lyophilized for 60 h. Lyophilized protein powders were stored at -80°C before use.

**MALDI-TOF Mass Spectroscopy.** Lyophilized TM proteins were dissolved in MilliQ water to a concentration to 50  $\mu$ M. The protein solutions were then analyzed with Bruker Daltonics ultraflex MALDI-TOF/TOF at the Biosciences Central Research Facility HKUST.

**Reconstitution of Tyrosinase.** *Streptomyces antibioticus* tyrosinase was produced using standard recombinant technology and *E. coli* expression system. The gene encoding *S. antibioticus* tyrosinase was purchased as gBlocks™ from Integrated DNA Technologies. This gene was cloned into pACYCDuet plasmid and expressed in *E. coli* BL21(DE3) in TB medium. The *E. coli* cells were grown at 37°C until OD<sub>600</sub> reached 0.6-0.8. The protein expression was induced with 500  $\mu$ M IPTG at 16°C for 20 h. Tyrosinase was purified with HisTrap HP columns (GE Healthcare Inc.) following the manufacturer's instructions. Tyrosinase was dialyzed against the Dialysis Buffer (50 mM sodium phosphate, 0.01 mM CuSO<sub>4</sub>, pH 6.5) at 4 °C. The resulting protein solution was diluted to 1.0 mg/mL, frozen with liquid N<sub>2</sub> and then stored at -80°C before use.

**Preparation of Hydrogels.** Lyophilized protein powder was dissolved in PBS to make a 10 wt% solution. Tyrosinase (1  $\mu$ g) was added to 60  $\mu$ L of protein solution to induce gelation. The

reaction mixture—a sitting drop with 8 mm in diameter—was placed on parafilm inside a petri dish. Wet Kimwipe was used to provide moisture within the petri dish. The gel was cured for 12 h to ensure complete reaction.

**Dynamic Shear Rheology.** Rheological measurements were performed on a TA Instruments ARES-RFS strain-controlled rheometer with a standard steel parallel-plate geometry (8-mm diameter). The gap was set at 0.9 mm. The mounted sample was sealed with silicone oil to prevent water evaporation.

Test modes included dynamic frequency- and strain-sweep tests. The frequency-sweep test was performed by holding the strain at 10% and varying the frequency from 100 to 0.1 rad/s. The strain-sweep test was performed by fixing the frequency at 10 rad/s and increasing the strain from 0.1 to 200%. All experiments were performed at room temperature.

**Adhesion Tests.** Adhesive strength was measured by using the lap shear adhesion test. The PMMA interface (25 mm  $\times$  25 mm) was glued by the mixture of 10  $\mu$ L of protein solution (10 wt%) and tyrosinase (0.17  $\mu$ g). The reaction was cured for 12 h inside a sealed container that was half filled with water to maintain 100% relative humidity. The Instron testing machine was set up with a 5 kN load cell and compressed air pressure clamps. The measurements were conducted at room temperature. The samples were extended at a rate of 10 mm/min until rupture point.

**Cell Encapsulation and Confocal Microscopy.** The protein powders was dissolved in DMEM (Sigma Aldrich) to a 10 wt% solution. A549 cells [American Tissue Cell Culture (ATCC); CCL-185] were first sub-cultured, harvested, and concentrated to a density of 10<sup>6</sup> cells/mL. A549 cells (~1000 cells) were resuspended within 50  $\mu$ L of protein solution supplemented with tyrosinase. To accelerate the gelation, 2  $\mu$ g of tyrosinase was added to 50  $\mu$ L of protein solution. This cell suspension in protein solution was plated on a bottom coverslip petri dish. The petri dish was flipped every 30 s to ensure full suspension of cells within the gel during the gelation process; this process lasted 15 min. The gel was then immersed with DMEM, incubated at 37°C, 5% CO<sub>2</sub> for 24 h before viability assays and confocal imaging.

LIVE/DEAD™ Viability/Cytotoxicity Kit for mammalian cell (Invitrogen) was used as per the manufacturer's instructions to stain the encapsulated A549 cells. The stained cells were visualized on a Nikon confocal C2+ system with two LED laser sources at 488 and 561 nm. The emission wavelengths were set at 510 and 610 nm for Calcein and Ethidium homodimer-1, respectively. The laser power was at 1% for both excitation wavelengths and the sensor gain was adjusted to 40 and 45 for the emission at 510 and 610 nm, respectively. To reduce noise, each image was scanned 4 times and averaged. The 20 $\times$  objective was used for z-stack scanning.

## Supplementary Table and Figures

**Table S1** The amino acid sequences of the full-length MFP-3 and -5. Truncated peptide motifs (TM3, TM5-1 and TM5-2) are shown in red, orange and purple, respectively.

|       | Amino Acid sequence                                                                                                       |
|-------|---------------------------------------------------------------------------------------------------------------------------|
| Mfp-3 | MNNFSVSVLEVLVLIGSF AVE SDAAAYYGPNYGP PRRYGGYNGYNRYARGYGGNRGWNR<br>GWNRGWR <b>GRKYY</b>                                    |
| Mfp-5 | MKLSCVVLVFLVTLAACIDV GSGYDGYSDGYYPGSAYNYP S GSHGYHGHGYK GKYYGKG<br><b>KKYYYK</b> YKRTGKYKYLK KARKYHRK <b>GYKKYY</b> GGGSS |

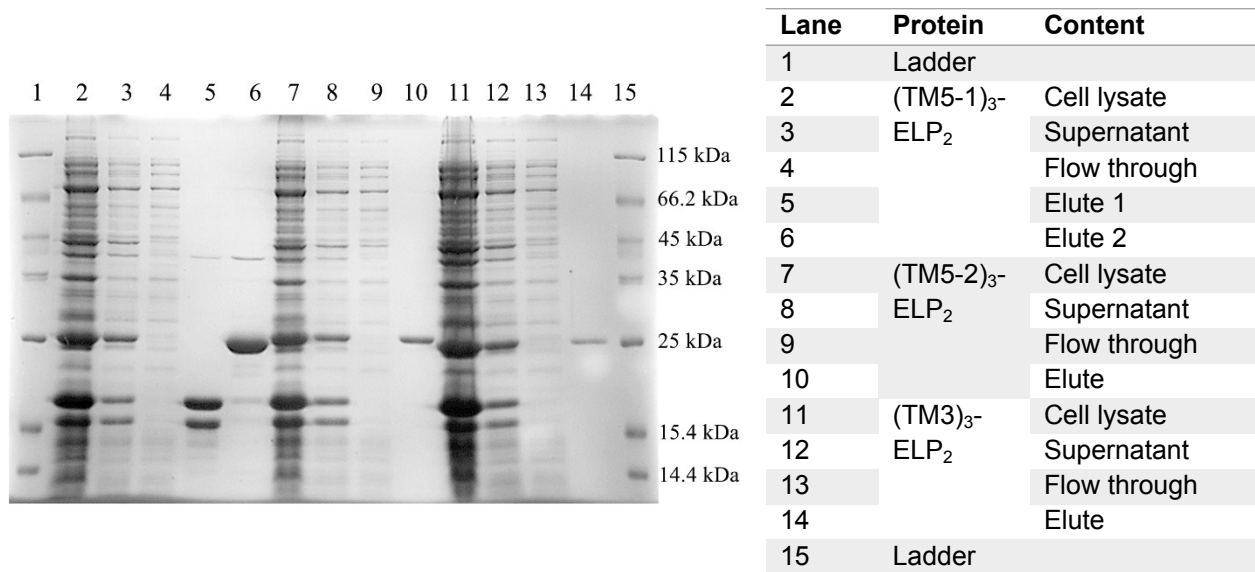

**Fig. S1** SDS-PAGE analysis.

a) (TM3)<sub>3</sub>-ELP<sub>2</sub>

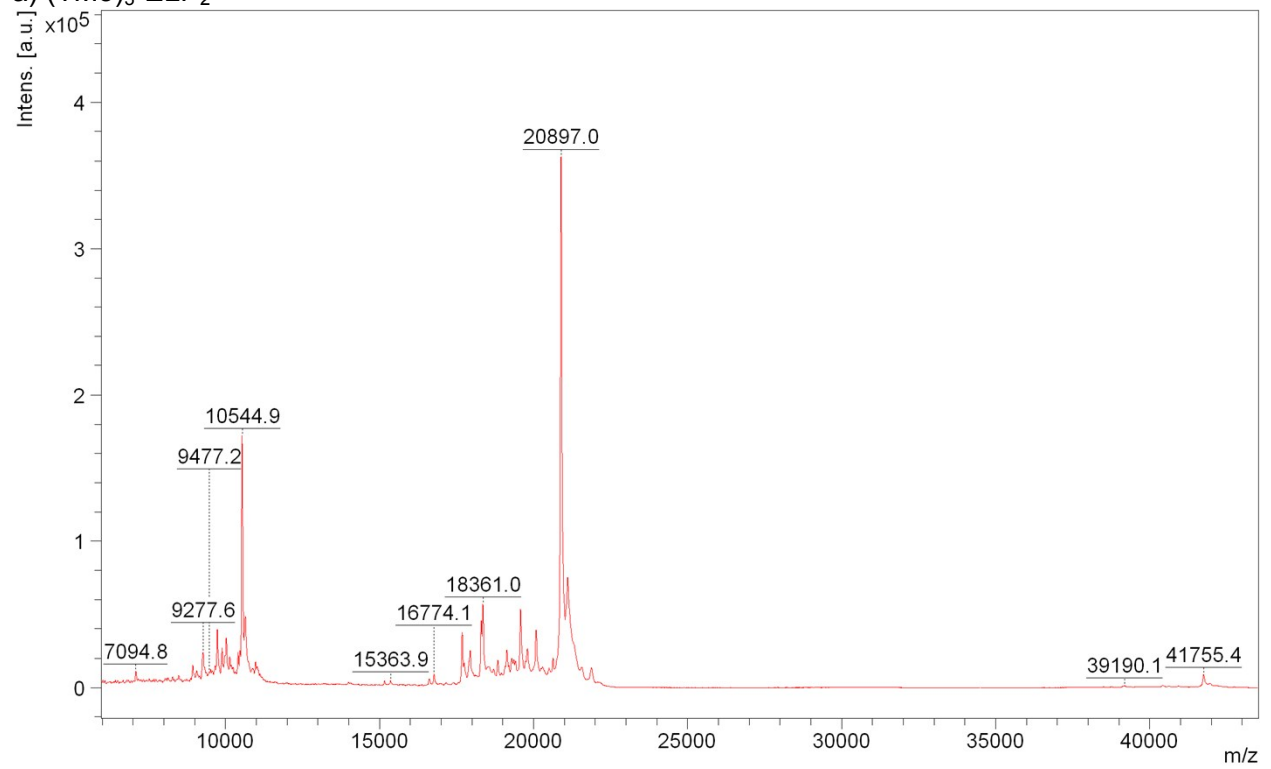

b) (TM5-1)<sub>3</sub>-ELP<sub>2</sub>

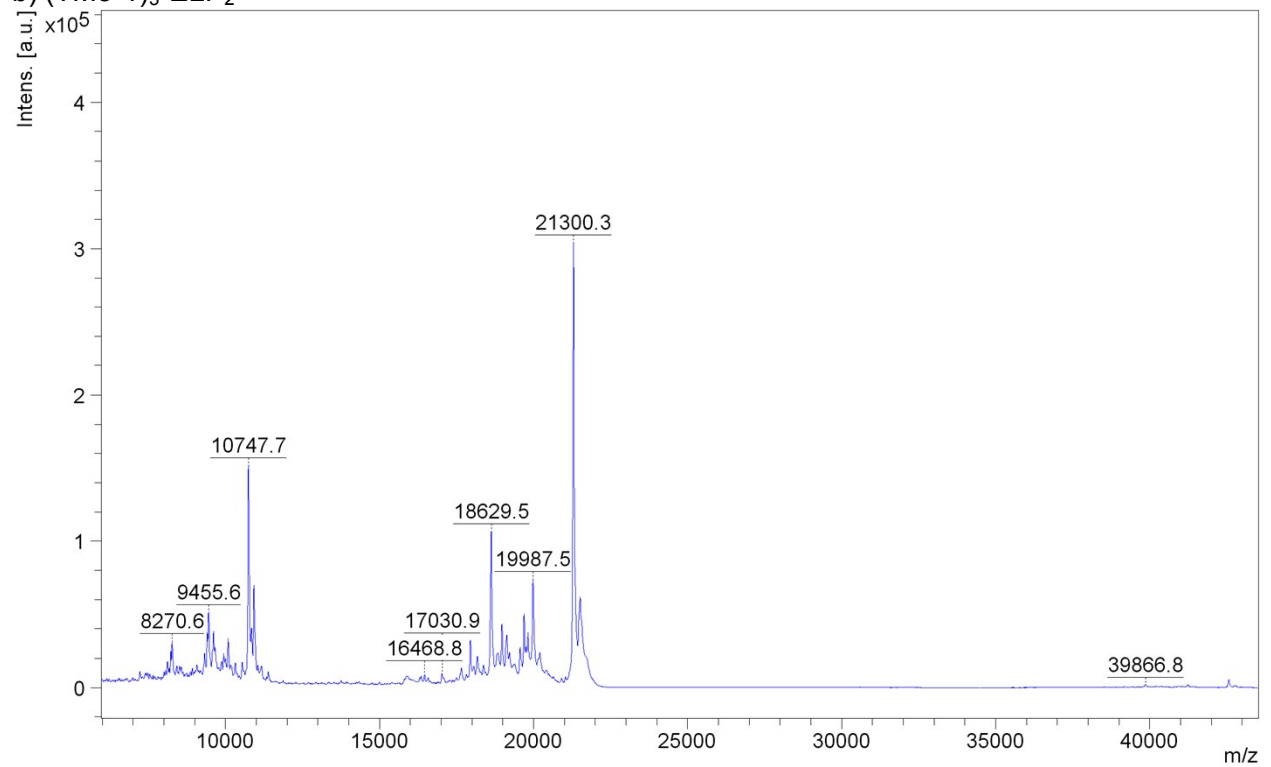

c) (TM5-2)<sub>3</sub>-ELP<sub>2</sub>

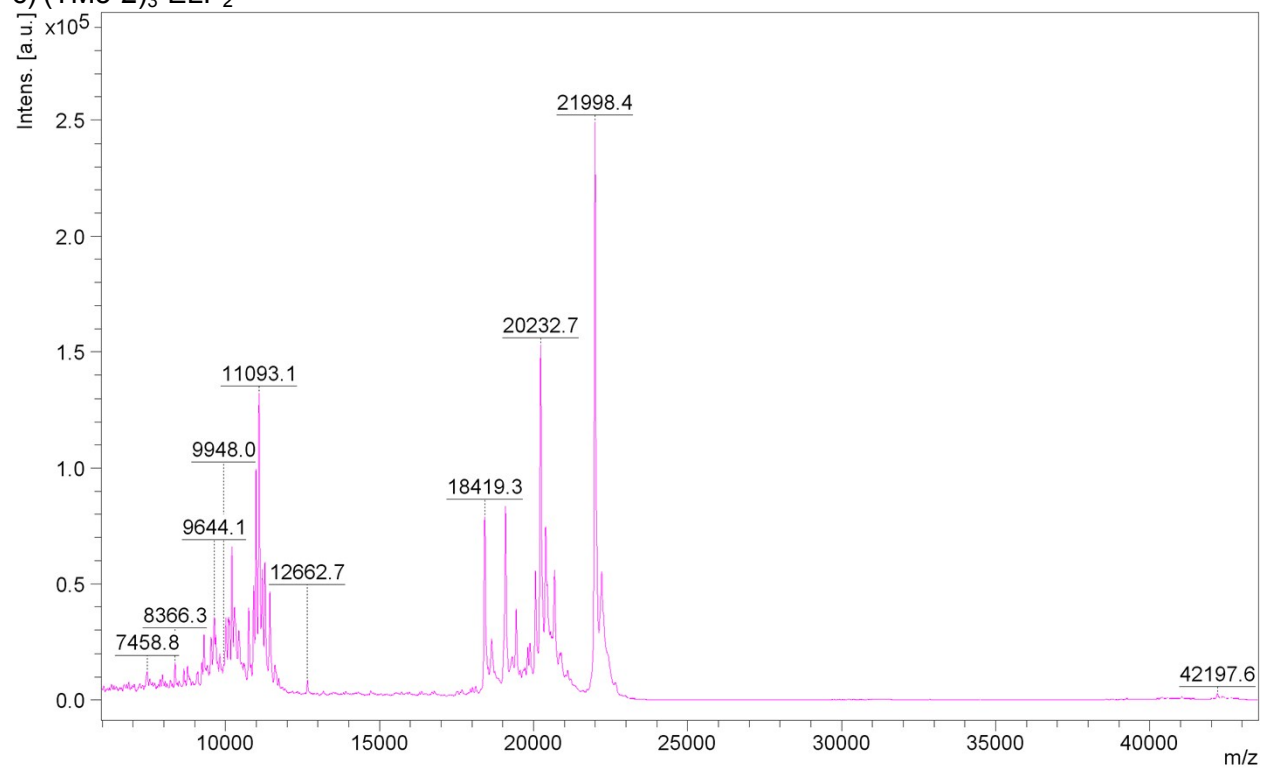

**Fig. S2** MALDI-TOF mass spectra of (TM3)<sub>3</sub>-ELP<sub>2</sub>, (TM5-1)<sub>3</sub>-ELP<sub>2</sub> and (TM5-2)<sub>3</sub>-ELP<sub>2</sub>. The theoretical molecular weights of (TM3)<sub>3</sub>-ELP<sub>2</sub>, (TM5-1)<sub>3</sub>-ELP<sub>2</sub> and (TM5-2)<sub>3</sub>-ELP<sub>2</sub> are 20885.74, 21291.23 and 21994.13 Da, respectively.
